# Supplementary material
Source: PubMed Central journal article supplement (PMC6629108)
Supplement: jciinsight-4-128308-s166.pdf [file jciinsight-4-128308-s166.pdf]

**Table S1.** Example daily meal plan for each of the experimental diets.

| High-Carbohydrate Diet                 | Amount<br>g | Energy<br>kcal | Protein<br>g | Carb<br>g | Fat<br>g | Chol<br>mg | SFA<br>g | MUFA<br>g | PUFA<br>g | Fiber<br>g | Sugar<br>g |
|----------------------------------------|-------------|----------------|--------------|-----------|----------|------------|----------|-----------|-----------|------------|------------|
| <b>Breakfast (Cereal and Eggs)</b>     |             |                |              |           |          |            |          |           |           |            |            |
| Cinnamon life cereal                   | 60.0        | 235.3          | 5.6          | 46.9      | 2.8      | 0.0        | 0.0      | 0.9       | 0.9       | 3.8        | 15.0       |
| Reduced sugar vanilla almond milk      | 150.0       | 40.0           | 0.3          | 6.9       | 1.3      | 0.0        | 0.0      | 0.6       | 0.0       | 0.0        | 6.9        |
| Egg beaters                            | 150.0       | 68.9           | 14.8         | 2.5       | 0.0      | 0.0        | 0.0      | 0.0       | 0.0       | 0.0        | 1.2        |
| Gouda cheese                           | 42.5        | 151.1          | 10.6         | 0.9       | 11.7     | 48.5       | 7.5      | 3.3       | 0.3       | 0.0        | 0.9        |
| Green pepper                           | 35.0        | 8.4            | 0.4          | 1.6       | 0.1      | 0.0        | 0.0      | 0.0       | 0.0       | 0.6        |            |
| Orange juice                           | 248.0       | 114.6          | 1.7          | 25.8      | 0.5      | 0.0        | 0.1      | 0.1       | 0.1       | 0.5        | 20.8       |
| <b>Morning Snack</b>                   |             |                |              |           |          |            |          |           |           |            |            |
| Pretzels                               | 30.0        | 110.1          | 3.2          | 24.3      | 0.0      | 0.0        | 0.0      | 0.0       | 0.0       | 1.1        | 0.5        |
| Grape juice                            | 240.0       | 148.2          | 0.9          | 35.4      | 0.3      | 0.0        | 0.1      | 0.0       | 0.1       | 0.5        | 34.1       |
| <b>Lunch (Loaded Baked Potato)</b>     |             |                |              |           |          |            |          |           |           |            |            |
| Russet potato                          | 300.0       | 292.4          | 7.9          | 64.3      | 0.4      | 0.0        | 0.1      | 0.0       | 0.2       | 6.9        | 3.2        |
| Diced ham                              | 42.5        | 56.3           | 6.7          | 1.5       | 2.6      | 22.4       | 0.7      | 1.5       | 0.3       | 0.0        | 0.7        |
| Broccoli                               | 50.0        | 16.5           | 1.4          | 2.4       | 0.1      | 0.0        | 0.0      | 0.0       | 0.1       | 1.5        | 0.7        |
| I can't believe it's not butter, light | 5.0         | 16.1           | 0.0          | 0.0       | 1.8      | 0.0        | 0.5      | 0.4       | 0.9       | 0.0        | 0.0        |
| Light sour cream                       | 20.0        | 27.6           | 0.7          | 1.4       | 2.1      | 7.0        | 1.3      | 0.6       | 0.1       | 0.0        | 0.0        |
| Cheddar cheese                         | 42.5        | 172.5          | 10.2         | 0.6       | 14.4     | 43.4       | 8.2      | 3.6       | 0.6       | 0.0        | 0.1        |
| Apple slices                           | 100.0       | 57.8           | 0.3          | 13.8      | 0.2      | 0.0        | 0.0      | 0.0       | 0.1       | 2.4        | 10.4       |
| Marshmallow fluff                      | 33.0        | 110.0          | 0.0          | 27.5      | 0.0      |            | 0.0      | 0.0       | 0.0       |            | 16.5       |
| <b>Afternoon Snack</b>                 |             |                |              |           |          |            |          |           |           |            |            |
| Gouda cheese                           | 42.5        | 151.1          | 10.6         | 0.9       | 11.7     | 48.5       | 7.5      | 3.3       | 0.3       | 0.0        | 0.9        |
| Deli turkey                            | 56.0        | 57.0           | 10.0         | 2.0       | 1.0      | 15.0       | 0.0      | 0.6       | 0.5       | 0.0        | 1.0        |
| <b>Dinner (BBQ Turkey Chili)</b>       |             |                |              |           |          |            |          |           |           |            |            |
| Russet potato                          | 150.0       | 119.7          | 3.0          | 26.6      | 0.1      | 0.0        | 0.0      | 0.0       | 0.1       | 2.3        | 1.2        |
| Onion                                  | 37.0        | 11.6           | 0.3          | 2.5       | 0.0      | 0.0        | 0.0      | 0.0       | 0.0       | 0.7        |            |
| BBQ sauce                              | 45.0        | 60.0           | 0.0          | 15.0      | 0.0      | 0.0        | 0.0      | 0.0       | 0.0       | 0.0        | 12.5       |
| Prego sauce                            | 61.0        | 22.5           | 0.5          | 5.2       | 0.0      | 0.0        | 0.0      | 0.0       | 0.0       | 1.4        | 3.3        |
| Worcestershire sauce                   | 4.5         | 3.5            | 0.0          | 0.9       | 0.0      | 0.0        | 0.0      | 0.0       | 0.0       | 0.0        | 0.5        |
| Cheddar cheese                         | 42.5        | 172.5          | 10.2         | 0.6       | 14.4     | 43.4       | 8.2      | 3.6       | 0.6       | 0.0        | 0.1        |
| Ground turkey                          | 95.0        | 106.2          | 22.4         | 0.0       | 1.9      | 52.3       | 0.5      | 0.5       | 0.6       | 0.0        | 0.0        |
| Green beans                            | 85.0        | 33.3           | 1.5          | 6.4       | 0.2      | 0.0        | 0.0      | 0.0       | 0.1       | 2.2        | 1.9        |
| Fig Newton's                           | 29.0        | 92.0           | 1.0          | 22.0      | 0.0      | 0.0        | 0.0      | 0.0       | 0.0       | 1.0        | 12.0       |
| Mandarin oranges                       | 80.0        | 32.8           | 0.6          | 7.5       | 0.0      | 0.0        | 0.0      | 0.0       | 0.0       | 1.0        | 6.6        |

*JCI Insight R-1*

|              |               |              |              |             |              |             |             |            |             |              |
|--------------|---------------|--------------|--------------|-------------|--------------|-------------|-------------|------------|-------------|--------------|
| <b>Total</b> | <b>2487.9</b> | <b>124.8</b> | <b>345.4</b> | <b>67.5</b> | <b>280.2</b> | <b>34.9</b> | <b>18.9</b> | <b>5.7</b> | <b>25.6</b> | <b>151.2</b> |
|--------------|---------------|--------------|--------------|-------------|--------------|-------------|-------------|------------|-------------|--------------|

| <b>Moderate-Carbohydrate Diet</b>        | <b>Amount<br/>g</b> | <b>Energy<br/>kcal</b> | <b>Protein<br/>g</b> | <b>Carb<br/>g</b> | <b>Fat<br/>g</b> | <b>Chol<br/>mg</b> | <b>SFA<br/>g</b> | <b>MUFA<br/>g</b> | <b>PUFA<br/>g</b> | <b>Fiber<br/>g</b> | <b>Sugar<br/>g</b> |
|------------------------------------------|---------------------|------------------------|----------------------|-------------------|------------------|--------------------|------------------|-------------------|-------------------|--------------------|--------------------|
| <b><i>Breakfast (Veggie Skillet)</i></b> |                     |                        |                      |                   |                  |                    |                  |                   |                   |                    |                    |
| Olive oil                                | 6.8                 | 61.2                   | 0.0                  | 0.0               | 6.8              | 0.0                | 0.9              | 5.0               | 0.7               | 0.0                | 0.0                |
| Butter                                   | 7.0                 | 51.4                   | 0.1                  | 0.0               | 5.7              | 15.1               | 3.6              | 1.5               | 0.2               | 0.0                | 0.0                |
| Hash browns                              | 106.0               | 89.8                   | 2.2                  | 18.8              | 0.7              |                    | 0.2              | 0.0               | 0.3               | 1.5                |                    |
| Breakfast sausage                        | 45.0                | 129.7                  | 6.9                  | 0.4               | 11.2             | 31.5               | 3.4              | 4.4               | 2.0               | 0.0                | 0.4                |
| White mushrooms                          | 24.0                | 6.8                    | 0.7                  | 0.8               | 0.1              | 0.0                | 0.0              | 0.0               | 0.0               | 0.2                | 0.5                |
| Green pepper                             | 25.0                | 6.0                    | 0.3                  | 1.1               | 0.1              | 0.0                | 0.0              | 0.0               | 0.0               | 0.4                |                    |
| Egg beaters                              | 100.0               | 45.9                   | 9.8                  | 1.6               | 0.0              | 0.0                | 0.0              | 0.0               | 0.0               | 0.0                | 0.8                |
| Mrs. Dash                                | 0.2                 | 0.0                    | 0.0                  | 0.0               | 0.0              | 0.0                | 0.0              | 0.0               | 0.0               | 0.0                | 0.0                |
| Gouda cheese                             | 42.5                | 151.1                  | 10.6                 | 0.9               | 11.7             | 48.5               | 7.5              | 3.3               | 0.3               | 0.0                | 0.9                |
| Mandarin oranges                         | 95.0                | 39.0                   | 0.7                  | 8.9               | 0.0              | 0.0                | 0.0              | 0.0               | 0.0               | 1.1                | 7.8                |
| Reduced sugar vanilla almond milk        | 240.0               | 64.0                   | 0.5                  | 11.0              | 2.0              | 0.0                | 0.0              | 1.0               | 0.0               | 0.0                | 11.0               |
| <b><i>Morning Snack</i></b>              |                     |                        |                      |                   |                  |                    |                  |                   |                   |                    |                    |
| Red pepper                               | 74.5                | 23.1                   | 0.7                  | 4.5               | 0.2              | 0.0                | 0.0              | 0.0               | 0.1               | 1.6                | 3.2                |
| Ranch seasoning                          | 1.9                 | 4.2                    | 0.0                  | 1.1               | 0.0              | 0.0                | 0.0              | 0.0               | 0.0               | 0.0                | 0.0                |
| Sour cream                               | 29.0                | 57.2                   | 0.6                  | 0.8               | 5.7              | 15.1               | 3.3              | 1.5               | 0.2               | 0.0                | 0.8                |
| Gouda cheese                             | 42.5                | 151.1                  | 10.6                 | 0.9               | 11.7             | 48.5               | 7.5              | 3.3               | 0.3               | 0.0                | 0.9                |
| <b><i>Lunch (Salsa Chicken)</i></b>      |                     |                        |                      |                   |                  |                    |                  |                   |                   |                    |                    |
| Chicken thigh                            | 110.0               | 127.3                  | 21.6                 | 0.0               | 4.5              | 103.4              | 1.2              | 1.6               | 1.0               | 0.0                | 0.0                |
| Taco seasoning                           | 2.8                 | 7.0                    | 0.1                  | 1.6               | 0.0              | 0.0                | 0.0              | 0.0               | 0.0               | 0.4                | 0.3                |
| Salsa                                    | 64.0                | 15.5                   | 0.0                  | 3.9               | 0.0              | 0.0                | 0.0              | 0.0               | 0.0               | 1.0                | 3.9                |
| Cheddar cheese                           | 42.5                | 172.5                  | 10.2                 | 0.6               | 14.4             | 43.4               | 8.2              | 3.6               | 0.6               | 0.0                | 0.1                |
| Butter                                   | 6.0                 | 44.0                   | 0.1                  | 0.0               | 4.9              | 12.9               | 3.1              | 1.3               | 0.2               | 0.0                | 0.0                |
| Onion                                    | 5.0                 | 1.6                    | 0.0                  | 0.3               | 0.0              | 0.0                | 0.0              | 0.0               | 0.0               | 0.1                |                    |
| Corn                                     | 30.0                | 30.6                   | 0.9                  | 6.2               | 0.2              | 0.0                | 0.0              | 0.1               | 0.1               | 0.6                | 0.8                |
| Rice                                     | 35.0                | 129.2                  | 2.7                  | 28.8              | 0.3              | 0.0                | 0.1              | 0.1               | 0.1               | 0.7                | 0.0                |
| Chicken broth                            | 30.0                | 1.3                    | 0.2                  | 0.0               | 0.1              | 0.0                | 0.0              | 0.0               | 0.0               | 0.0                | 0.0                |
| Water                                    | 20.0                | 0.0                    | 0.0                  | 0.0               | 0.0              | 0.0                | 0.0              | 0.0               | 0.0               | 0.0                | 0.0                |
| Salsa                                    | 27.0                | 6.5                    | 0.0                  | 1.6               | 0.0              | 0.0                | 0.0              | 0.0               | 0.0               | 0.4                | 1.6                |
| Olive oil                                | 5.0                 | 54.0                   | 0.0                  | 0.0               | 6.0              | 0.0                | 0.8              | 4.4               | 0.6               | 0.0                | 0.0                |
| <b><i>Afternoon Snack</i></b>            |                     |                        |                      |                   |                  |                    |                  |                   |                   |                    |                    |
| Strawberry preserves                     | 20.0                | 52.0                   | 0.0                  | 13.0              | 0.0              | 0.0                | 0.0              | 0.0               | 0.0               | 0.0                | 12.0               |

*JCI Insight R-1*

|                                              |       |               |              |              |              |              |             |             |             |             |             |
|----------------------------------------------|-------|---------------|--------------|--------------|--------------|--------------|-------------|-------------|-------------|-------------|-------------|
| Wheat thin crackers                          | 31.0  | 146.0         | 2.0          | 21.0         | 6.0          | 0.0          | 1.0         | 1.5         | 3.5         | 1.0         | 4.0         |
| <b><i>Dinner (Cheeseburger Meatloaf)</i></b> |       |               |              |              |              |              |             |             |             |             |             |
| Ground beef                                  | 113.0 | 139.2         | 24.6         | 0.0          | 4.5          | 69.2         | 2.1         | 1.8         | 0.3         | 0.0         | 0.0         |
| Bread crumbs                                 | 10.1  | 38.9          | 1.3          | 7.2          | 0.5          | 0.0          | 0.1         | 0.1         | 0.2         | 0.5         | 0.6         |
| Onion                                        | 13.0  | 4.1           | 0.1          | 0.9          | 0.0          | 0.0          | 0.0         | 0.0         | 0.0         | 0.2         |             |
| Egg beaters                                  | 15.0  | 6.9           | 1.5          | 0.2          | 0.0          | 0.0          | 0.0         | 0.0         | 0.0         | 0.0         | 0.1         |
| Cheddar cheese                               | 42.5  | 172.5         | 10.2         | 0.6          | 14.4         | 43.4         | 8.2         | 3.6         | 0.6         | 0.0         | 0.1         |
| Ketchup                                      | 30.0  | 34.4          | 0.3          | 8.2          | 0.0          | 0.0          | 0.0         | 0.0         | 0.0         | 0.1         | 6.4         |
| Corn                                         | 60.0  | 61.2          | 1.8          | 12.4         | 0.5          | 0.0          | 0.1         | 0.1         | 0.2         | 1.3         | 1.5         |
| I can't believe it's not butter, light       | 7.0   | 22.5          | 0.0          | 0.0          | 2.5          | 0.0          | 0.8         | 0.5         | 1.3         | 0.0         | 0.0         |
| Potatoes                                     | 113.0 | 90.1          | 2.3          | 20.0         | 0.1          | 0.0          | 0.0         | 0.0         | 0.0         | 1.7         | 0.9         |
| Heavy cream                                  | 15.0  | 52.9          | 0.3          | 0.4          | 5.6          | 20.6         | 3.5         | 1.6         | 0.2         | 0.0         | 0.4         |
| Olive ol                                     | 5.0   | 45.0          | 0.0          | 0.0          | 5.0          | 0.0          | 0.7         | 3.6         | 0.5         | 0.0         | 0.0         |
| Butter                                       | 5.0   | 36.7          | 0.0          | 0.0          | 4.1          | 10.8         | 2.6         | 1.1         | 0.2         | 0.0         | 0.0         |
| Applesauce                                   | 100.0 | 72.1          | 0.2          | 17.5         | 0.2          | 0.0          | 0.0         | 0.0         | 0.1         | 1.2         | 14.7        |
| <b>Total</b>                                 |       | <b>2444.5</b> | <b>124.3</b> | <b>195.6</b> | <b>129.5</b> | <b>462.0</b> | <b>59.0</b> | <b>44.9</b> | <b>13.9</b> | <b>13.9</b> | <b>73.9</b> |

| <b>Moderate-Carbohydrate Diet</b>            | <b>Amount</b> | <b>Energy kcal</b> | <b>Protein g</b> | <b>Carb g</b> | <b>Fat g</b> | <b>Chol mg</b> | <b>SFA g</b> | <b>MUFA g</b> | <b>PUFA g</b> | <b>Fiber g</b> | <b>Sugar g</b> |
|----------------------------------------------|---------------|--------------------|------------------|---------------|--------------|----------------|--------------|---------------|---------------|----------------|----------------|
| <b><i>Breakfast (Breakfast Scramble)</i></b> |               |                    |                  |               |              |                |              |               |               |                |                |
| Spinach                                      | 39.0          | 14.2               | 1.4              | 1.6           | 0.2          | 0.0            | 0.0          | 0.0           | 0.0           | 1.1            | 0.3            |
| Bacon                                        | 30.0          | 123.8              | 3.8              | 0.4           | 11.9         | 19.8           | 4.0          | 5.2           | 1.9           | 0.0            | 0.3            |
| Butter                                       | 7.1           | 52.1               | 0.1              | 0.0           | 5.8          | 15.3           | 3.6          | 1.5           | 0.2           | 0.0            | 0.0            |
| Eggs                                         | 125.0         | 173.4              | 15.7             | 0.9           | 11.9         | 465.0          | 3.9          | 4.6           | 2.4           | 0.0            | 0.5            |
| Heavy cream                                  | 30.0          | 105.7              | 0.6              | 0.8           | 11.1         | 41.1           | 6.9          | 3.2           | 0.4           | 0.0            | 0.8            |
| Butter                                       | 7.1           | 52.1               | 0.1              | 0.0           | 5.8          | 15.3           | 3.6          | 1.5           | 0.2           | 0.0            | 0.0            |
| Cheddar cheese                               | 42.5          | 172.5              | 10.2             | 0.6           | 14.4         | 43.4           | 8.2          | 3.6           | 0.6           | 0.0            | 0.1            |
| Unsweetened vanilla almond milk              | 150.0         | 19.1               | 0.6              | 0.6           | 1.6          | 0.0            | 0.0          | 0.9           | 0.3           | 0.3            | 0.0            |
| <b><i>Morning Snack</i></b>                  |               |                    |                  |               |              |                |              |               |               |                |                |
| Roasted almonds                              | 28.0          | 182.6              | 5.9              | 5.0           | 15.4         | 0.0            | 1.2          | 9.7           | 3.8           | 2.9            | 1.3            |
| Bouillon                                     | 5.0           | 5.7                | 0.0              | 1.4           | 0.0          | 0.0            | 0.0          | 0.0           | 0.0           | 0.0            | 0.0            |
| Butter                                       | 7.5           | 55.0               | 0.1              | 0.0           | 6.1          | 16.1           | 3.9          | 1.6           | 0.2           | 0.0            | 0.0            |
| <b><i>Lunch (Tuna Salad)</i></b>             |               |                    |                  |               |              |                |              |               |               |                |                |
| Canned tuna                                  | 90.0          | 171.3              | 26.2             | 0.0           | 7.4          | 16.2           | 1.4          | 2.7           | 2.6           | 0.0            | 0.0            |
| Celery                                       | 40.0          | 6.5                | 0.3              | 1.2           | 0.1          | 0.0            | 0.0          | 0.0           | 0.0           | 0.6            | 0.5            |
| Mayonnaise                                   | 40.0          | 271.9              | 0.4              | 0.2           | 29.9         | 16.8           | 4.7          | 6.7           | 17.9          | 0.0            | 0.2            |

*JCI Insight R-1*

|                                              |               |              |             |              |              |             |             |             |             |             |     |
|----------------------------------------------|---------------|--------------|-------------|--------------|--------------|-------------|-------------|-------------|-------------|-------------|-----|
| Slivered almonds                             | 13.5          | 83.7         | 2.9         | 2.9          | 6.7          | 0.0         | 0.5         | 4.3         | 1.7         | 1.7         | 0.6 |
| Cherry tomatoes                              | 50.0          | 10.4         | 0.4         | 1.9          | 0.1          | 0.0         | 0.0         | 0.0         | 0.0         | 0.6         | 1.3 |
| Cucumber                                     | 60.0          | 10.9         | 0.4         | 2.2          | 0.1          | 0.0         | 0.0         | 0.0         | 0.0         | 0.3         | 1.0 |
| Cheddar cheese                               | 56.7          | 230.1        | 13.6        | 0.8          | 19.2         | 57.8        | 11.0        | 4.8         | 0.8         | 0.0         | 0.2 |
| Sugar free jello                             | 89.0          | 4.0          | 1.0         | 0.0          | 0.0          | 0.0         | 0.0         | 0.0         | 0.0         | 0.0         | 0.0 |
| <b><i>Afternoon Snack</i></b>                |               |              |             |              |              |             |             |             |             |             |     |
| Red pepper                                   | 74.5          | 22.9         | 0.7         | 4.5          | 0.2          | 0.0         | 0.0         | 0.0         | 0.1         | 1.6         | 3.1 |
| Ranch seasoning                              | 1.9           | 4.2          | 0.0         | 1.1          | 0.0          | 0.0         | 0.0         | 0.0         | 0.0         | 0.0         | 0.0 |
| Sour cream                                   | 29.0          | 57.2         | 0.6         | 0.8          | 5.7          | 15.1        | 3.3         | 1.5         | 0.2         | 0.0         | 0.8 |
| Gouda cheese                                 | 42.5          | 151.1        | 10.6        | 0.9          | 11.7         | 48.5        | 7.5         | 3.3         | 0.3         | 0.0         | 0.9 |
| <b><i>Dinner (Ranch Cheddar Chicken)</i></b> |               |              |             |              |              |             |             |             |             |             |     |
| Chicken Thigh                                | 114.0         | 131.9        | 22.4        | 0.0          | 4.7          | 107.2       | 1.3         | 1.7         | 1.1         | 0.0         | 0.0 |
| Mayonnaise                                   | 27.6          | 187.6        | 0.3         | 0.2          | 20.7         | 11.6        | 3.2         | 4.6         | 12.3        | 0.0         | 0.2 |
| Ranch seasoning                              | 7.0           | 15.6         | 0.0         | 3.9          | 0.0          | 0.0         | 0.0         | 0.0         | 0.0         | 0.0         | 0.0 |
| Garlic powder                                | 0.5           | 1.8          | 0.1         | 0.4          | 0.0          | 0.0         | 0.0         | 0.0         | 0.0         | 0.0         | 0.0 |
| Cheddar cheese                               | 28.4          | 115.3        | 6.8         | 0.4          | 9.6          | 29.0        | 5.5         | 2.4         | 0.4         | 0.0         | 0.1 |
| Spinach                                      | 30.0          | 7.1          | 0.7         | 1.1          | 0.0          | 0.0         | 0.0         | 0.0         | 0.0         | 0.7         | 0.0 |
| Cucumber                                     | 15.0          | 2.7          | 0.1         | 0.5          | 0.0          | 0.0         | 0.0         | 0.0         | 0.0         | 0.1         | 0.3 |
| Cherry tomatoes                              | 20.0          | 4.2          | 0.2         | 0.8          | 0.0          | 0.0         | 0.0         | 0.0         | 0.0         | 0.2         | 0.5 |
| Italian dressing                             | 20.0          | 48.0         | 0.1         | 2.4          | 4.2          | 0.0         | 0.6         | 1.1         | 2.2         | 0.0         | 2.2 |
| <b>Total</b>                                 | <b>2494.8</b> | <b>126.3</b> | <b>37.5</b> | <b>204.4</b> | <b>918.0</b> | <b>74.4</b> | <b>64.9</b> | <b>49.7</b> | <b>10.2</b> | <b>15.2</b> |     |

SFA = saturated fat, MUFA=monounsaturated fat, PUFA=polyunsaturated fat

**Table S2.** Visceral and liver fat responses obtained by magnetic resonance imaging (MRI).

|                    | <b>BL</b>   | <b>LC</b>   | <b>MC</b>   | <b>HC</b>   | <b>P Value</b> |
|--------------------|-------------|-------------|-------------|-------------|----------------|
| MRI                |             |             |             |             |                |
| VAT (%)            | 5188 ± 1643 | 4849 ± 1563 | 4913 ± 1606 | 4806 ± 1560 | 0.818          |
| Total Liver AT (%) | 13.9 ± 7.4  | 10.3 ± 6.0  | 10.3 ± 5.6  | 11.6 ± 6.0  | 0.188          |
| Lobe 1 (%)         | 11.9 ± 7.8  | 9.4 ± 6.3   | 8.4 ± 4.9   | 10.1 ± 5.8  | 0.151          |
| Lobe 2 (%)         | 12.7 ± 7.8  | 10.1 ± 6.5  | 9.2 ± 5.1   | 10.3 ± 5.7  | 0.388          |
| Lobe 3 (%)         | 13.4 ± 7.7  | 9.7 ± 5.9   | 9.2 ± 5.6   | 10.9 ± 5.3  | 0.420          |
| Lobe 4a (%)        | 12.7 ± 7.6  | 9.7 ± 6.2   | 8.9 ± 5.6   | 9.8 ± 5.2   | 0.545          |
| Lobe 4b (%)        | 13.2 ± 8.1  | 9.8 ± 6.6   | 9.2 ± 6.7   | 10.7 ± 7.1  | 0.347          |
| Lobe 5 (%)         | 14.5 ± 7.0  | 10.9 ± 6.0  | 10.6 ± 5.8  | 11.9 ± 5.7  | 0.308          |
| Lobe 6 (%)         | 15.3 ± 7.2  | 12.3 ± 6.7  | 11.4 ± 5.9  | 12.8 ± 6.2  | 0.381          |
| Lobe 7 (%)         | 15.8 ± 7.4  | 12.2 ± 6.5  | 11.8 ± 6.2  | 13.3 ± 6.4  | 0.264          |
| Lobe 8 (%)         | 15.3 ± 7.2  | 11.8 ± 6.4  | 11.3 ± 6.0  | 12.8 ± 6.0  | 0.192          |

Values are mean ± SD. All MRI data n=14. Two patients failed to complete all MRI protocols due to claustrophobic feelings (n=1) and inability to remove body jewelry (n=1)

Diets: LC, low-carbohydrate; MC, moderate-carbohydrate; HC, high-carbohydrate

MRI = magnetic resonance imaging; VAT = visceral adipose tissue

P value from 3-way (LC, MC, HC) repeated measures ANOVA

**Table S3.** Number of metabolic syndrome characteristics present at baseline and after each diet.

| ID# | Sex | Baseline      | Low-Carbohydrate | Moderate-Carbohydrate | High-Carbohydrate |
|-----|-----|---------------|------------------|-----------------------|-------------------|
| 1   | F   | 3 (W,B,T)     | 3 (W,H,T)        | 4 (W,B,G,T)           | 5 (W,B,H,G,T)     |
| 2   | F   | 4 (W,H,T)     | 2 (W,H)          | 3 (H,H,T)             | 4 (W,B,H,T)       |
| 3   | M   | 4 (W,B,H,T)   | 2 (W,H)          | 4 (W,B,H,G)           | 5 (W,B,H,G,T)     |
| 4   | F   | 3 (W,H,G)     | 2 (W,H)          | 2 (W,H)               | 4 (W,B,H,T)       |
| 5   | M   | 5 (W,B,H,G,T) | 2 (W,T)          | 4 (W,B,H,T)           | 3 (W,H,T)         |
| 6   | M   | 3 (W,B,H)     | 2 (B,H)          | 1 (H)                 | 2 (B,H)           |
| 7   | M   | 5 (W,B,H,G,T) | 3 (W,H,T)        | 3 (W,H,T)             | 4 (W,B,H,T)       |
| 8   | M   | 3 (B,G,T)     | 1 (G)            | 2 (G,T)               | 3 (B,G,T)         |
| 9   | M   | 4 (W,H,G,T)   | 2 (W,H)          | 4 (W,H,G,T)           | 4 (W,H,G,T)       |
| 10  | M   | 4 (W,B,H,G)   | 3 (W,B,H)        | 3 (W,H,G)             | 4 (W,B,H,G)       |
| 11  | M   | 4 (W,B,G,T)   | 3 (W,H,G)        | 4 (W,B,H,G)           | 5 (W,B,H,G,T)     |
| 12  | F   | 3 (W,H,T)     | 1 (W)            | 4 (W,B,H,T)           | 3 (W,B,H)         |
| 13  | F   | 3 (W,B,G)     | 2 (W,G)          | 3 (W,B,G)             | 5 (W,B,H,G,T)     |
| 14  | F   | 3 (W,H,T)     | 3 (W,H,T)        | 4 (W,H,G,T)           | 3 (W,H,T)         |
| 15  | M   | 5 (W,B,H,G,T) | 4 (W,H,G,T)      | 5 (W,B,H,G,T)         | 4 (W,H,G,T)       |
| 16  | M   | 4 (W,H,G,T)   | 3 (W,H,G)        | 3 (W,H,T)             | 4 (W,H,G,T)       |

F=female, M=male, W=waist circumference, BP=blood pressure, H=HDL-cholesterol, G=glucose, T=triglycerides

**Table S4.** Circulating cholesterol and lipoprotein particle responses.

|                           | <b>BL</b>    | <b>LC</b>              | <b>MC</b>                | <b>HC</b>                | <b>P Value</b> |
|---------------------------|--------------|------------------------|--------------------------|--------------------------|----------------|
| Total Cholesterol (mg/dL) | 195 ± 28     | 182 ± 39               | 193 ± 33                 | 195 ± 39                 | 0.061          |
| LDL-C (mg/dL)             | 122 ± 26     | 118 ± 35               | 124 ± 31                 | 122 ± 34                 | 0.560          |
| <hr/>                     |              |                        |                          |                          |                |
| HDL (nmol/L)              |              |                        |                          |                          |                |
| Large                     | 4439 ± 462   | 4563 ± 852             | 4442 ± 613               | 4591 ± 747               | 0.762          |
| Small                     | 13677 ± 1431 | 13463 ± 1860           | 13706 ± 1820             | 14114 ± 2606             | 0.573          |
| LDL Peak Diameter (Å)     | 214.9 ± 6.1  | 220 ± 4.8 <sup>c</sup> | 216.2 ± 5.5 <sup>b</sup> | 213.2 ± 6.3 <sup>a</sup> | <0.001         |
| LDL (nmol/L)              |              |                        |                          |                          |                |
| I (Largest)               | 203 ± 79     | 272 ± 90 <sup>b</sup>  | 234 ± 80 <sup>a</sup>    | 209 ± 111 <sup>a</sup>   | 0.004          |
| IIa                       | 176 ± 62     | 226 ± 68               | 201 ± 62                 | 179 ± 104                | 0.058          |
| IIb                       | 235 ± 78     | 237 ± 81               | 245 ± 72                 | 232 ± 98                 | 0.815          |
| IIIa                      | 247 ± 93     | 163 ± 58 <sup>b</sup>  | 234 ± 102 <sup>a</sup>   | 251 ± 74 <sup>a</sup>    | <0.001         |
| IIIb                      | 105 ± 60     | 56 ± 27 <sup>b</sup>   | 95 ± 58 <sup>a</sup>     | 119 ± 64 <sup>a</sup>    | <0.001         |
| IVa                       | 96 ± 71      | 68 ± 39 <sup>b</sup>   | 81 ± 41 <sup>ab</sup>    | 113 ± 84 <sup>a</sup>    | 0.033          |
| IVb                       | 66 ± 26      | 63 ± 22                | 60 ± 18                  | 69 ± 28                  | 0.368          |
| IVc (Smallest)            | 76 ± 16      | 76 ± 18                | 74 ± 15                  | 80 ± 18                  | 0.382          |
| IDL (nmol/L)              |              |                        |                          |                          |                |
| Large                     | 165 ± 33     | 158 ± 49               | 171 ± 47                 | 180 ± 59                 | 0.072          |
| Small                     | 154 ± 43     | 185 ± 57               | 174 ± 46                 | 171 ± 60                 | 0.426          |
| VLDL (nmol/L)             |              |                        |                          |                          |                |
| Large                     | 28 ± 12      | 22 ± 16 <sup>b</sup>   | 29 ± 17 <sup>ab</sup>    | 36 ± 17 <sup>a</sup>     | 0.016          |
| Medium                    | 71 ± 22      | 59 ± 27 <sup>b</sup>   | 71 ± 24 <sup>ab</sup>    | 86 ± 37 <sup>a</sup>     | 0.011          |
| Small                     | 66 ± 14      | 58 ± 17 <sup>b</sup>   | 62 ± 18 <sup>ab</sup>    | 71 ± 29 <sup>a</sup>     | 0.045          |

Values are mean ± SD; n=16

Diets: LC, low-carbohydrate; MC, moderate-carbohydrate; HC, high-carbohydrate

P value from 3-way (LC, MC, HC) repeated measures ANOVA. Values not sharing a common letter are different ( $P<0.05$ )

**Table S5.** Plasma triglyceride and phospholipid fatty composition responses expressed as weight percent (wt%).

|                           | BL           | LC                        | MC                         | HC                        | P Value |
|---------------------------|--------------|---------------------------|----------------------------|---------------------------|---------|
| <b>Triglyceride (wt%)</b> |              |                           |                            |                           |         |
| 14:0                      | 2.05 ± 0.59  | 1.57 ± 0.59 <sup>c</sup>  | 2.37 ± 0.58 <sup>b</sup>   | 2.76 ± 0.71 <sup>a</sup>  | <0.001  |
| 15:0                      | 0.29 ± 0.07  | 0.35 ± 0.09 <sup>b</sup>  | 0.40 ± 0.35 <sup>a</sup>   | 0.42 ± 0.07 <sup>a</sup>  | 0.018   |
| 16:0                      | 26.24 ± 1.80 | 26.26 ± 1.31 <sup>b</sup> | 26.41 ± 2.22 <sup>b</sup>  | 28.19 ± 2.06 <sup>a</sup> | 0.001   |
| 16:1n7                    | 3.91 ± 1.18  | 2.85 ± 0.75 <sup>c</sup>  | 3.69 ± 1.04 <sup>b</sup>   | 4.57 ± 1.34 <sup>a</sup>  | <0.001  |
| 17:0                      | 0.35 ± 0.08  | 0.43 ± 0.15               | 0.39 ± 0.04                | 0.38 ± 0.06               | 0.353   |
| Phytanic                  | 0.28 ± 0.11  | 0.36 ± 0.18               | 0.32 ± 0.18                | 0.27 ± 0.12               | 0.079   |
| 18:0                      | 3.58 ± 0.51  | 4.11 ± 0.56               | 3.85 ± 0.62                | 3.60 ± 0.83               | 0.086   |
| 18:1n9                    | 33.45 ± 2.62 | 36.14 ± 3.14 <sup>b</sup> | 35.36 ± 2.90 <sup>b</sup>  | 33.18 ± 2.20 <sup>a</sup> | 0.006   |
| 18:2n6                    | 20.70 ± 2.90 | 18.93 ± 3.31 <sup>b</sup> | 18.36 ± 2.97 <sup>b</sup>  | 16.86 ± 3.86 <sup>a</sup> | 0.018   |
| 18:3n6                    | 0.38 ± 0.29  | 0.34 ± 0.14               | 0.37 ± 0.26                | 0.30 ± 0.30               | 0.652   |
| 18:3n3                    | 1.34 ± 0.30  | 1.01 ± 0.23 <sup>b</sup>  | 1.16 ± 0.20 <sup>b</sup>   | 0.49 ± 0.65 <sup>a</sup>  | <0.001  |
| 20:2n6                    | 0.28 ± 0.08  | 0.26 ± 0.08               | 0.27 ± 0.08                | 0.28 ± 0.08               | 0.514   |
| 20:3n6                    | 0.38 ± 0.07  | 0.28 ± 0.06 <sup>b</sup>  | 0.35 ± 0.08 <sup>a</sup>   | 0.38 ± 0.08 <sup>a</sup>  | <0.001  |
| 20:4n6                    | 1.57 ± 0.51  | 1.93 ± 0.63 <sup>b</sup>  | 1.44 ± 0.55 <sup>a</sup>   | 1.40 ± 0.48 <sup>a</sup>  | 0.003   |
| 20:5n3                    | 0.22 ± 0.12  | 0.20 ± 0.11               | 0.21 ± 0.12                | 0.20 ± 0.12               | 0.744   |
| 22:4n6                    | 0.20 ± 0.05  | 0.21 ± 0.06               | 0.21 ± 0.05                | 0.23 ± 0.04               | 0.211   |
| 22:5n3                    | 0.32 ± 0.07  | 0.34 ± 0.11               | 0.33 ± 0.08                | 0.34 ± 0.10               | 0.781   |
| 22:6n3                    | 0.33 ± 0.11  | 0.53 ± 0.16 <sup>b</sup>  | 0.32 ± 0.09 <sup>a</sup>   | 0.29 ± 0.12 <sup>a</sup>  | <0.001  |
| SFA                       | 32.68 ± 1.92 | 32.88 ± 2.04 <sup>b</sup> | 33.64 ± 2.96 <sup>b</sup>  | 35.50 ± 3.01 <sup>a</sup> | 0.008   |
| MUFA                      | 38.07 ± 2.91 | 39.72 ± 2.91              | 39.90 ± 2.36               | 38.68 ± 2.34              | 0.407   |
| PUFA                      | 25.92 ± 3.09 | 24.29 ± 4.18 <sup>b</sup> | 23.23 ± 3.52 <sup>ab</sup> | 21.65 ± 4.72 <sup>a</sup> | 0.031   |
| <b>Phospholipid (%wt)</b> |              |                           |                            |                           |         |
| 14:0                      | 0.43 ± 0.10  | 0.39 ± 0.09 <sup>c</sup>  | 0.50 ± 0.09 <sup>b</sup>   | 0.56 ± 0.12 <sup>a</sup>  | <0.001  |
| 15:0                      | 0.19 ± 0.04  | 0.24 ± 0.04 <sup>b</sup>  | 0.27 ± 0.04 <sup>a</sup>   | 0.27 ± 0.06 <sup>a</sup>  | 0.020   |
| 16:0                      | 25.24 ± 0.86 | 26.34 ± 1.05              | 25.83 ± 0.67               | 26.37 ± 0.80              | 0.051   |
| 16:1n7                    | 0.75 ± 0.20  | 0.57 ± 0.11 <sup>c</sup>  | 0.76 ± 0.15 <sup>b</sup>   | 0.91 ± 0.19 <sup>a</sup>  | <0.001  |
| 17:0                      | 0.33 ± 0.05  | 0.40 ± 0.03               | 0.40 ± 0.05                | 0.40 ± 0.05               | 0.974   |
| Phytanic                  | 0.28 ± 0.11  | 0.32 ± 0.12               | 0.30 ± 0.12                | 0.30 ± 0.09               | 0.469   |



JCI Insight R-1

|        |              |                            |                            |                           |        |
|--------|--------------|----------------------------|----------------------------|---------------------------|--------|
| 18:0   | 13.93 ± 1.06 | 12.15 ± 0.18               | 12.65 ± 0.90               | 12.68 ± 0.97              | 0.160  |
| 18:1n9 | 7.61 ± 0.97  | 7.34 ± 0.87 <sup>b</sup>   | 8.08 ± 1.36 <sup>a</sup>   | 8.36 ± 1.28 <sup>a</sup>  | 0.013  |
| 18:2n6 | 22.81 ± 2.79 | 21.06 ± 1.74 <sup>ab</sup> | 21.82 ± 2.41 <sup>b</sup>  | 20.08 ± 3.06 <sup>a</sup> | 0.021  |
| 18:3n3 | 0.24 ± 0.07  | 0.18 ± 0.05 <sup>b</sup>   | 0.23 ± 0.05 <sup>a</sup>   | 0.26 ± 0.06 <sup>a</sup>  | <0.001 |
| 20:2n6 | 0.34 ± 0.05  | 0.32 ± 0.04 <sup>b</sup>   | 0.33 ± 0.05 <sup>b</sup>   | 0.37 ± 0.07 <sup>a</sup>  | 0.003  |
| 20:3n6 | 3.55 ± 0.53  | 2.75 ± 0.65 <sup>c</sup>   | 3.64 ± 0.68 <sup>b</sup>   | 4.18 ± 0.71 <sup>a</sup>  | <0.001 |
| 20:4n6 | 13.42 ± 2.12 | 16.09 ± 1.43 <sup>b</sup>  | 13.90 ± 1.73 <sup>a</sup>  | 13.08 ± 1.54 <sup>a</sup> | <0.001 |
| 20:5n3 | 0.70 ± 0.25  | 0.64 ± 0.18 <sup>c</sup>   | 0.73 ± 0.22 <sup>b</sup>   | 0.83 ± 0.21 <sup>a</sup>  | <0.001 |
| 22:0   | 0.36 ± 0.07  | 0.35 ± 0.05                | 0.36 ± 0.08                | 0.36 ± 0.23               | 0.941  |
| 22:4n6 | 0.62 ± 0.12  | 0.60 ± 0.11                | 0.63 ± 0.09                | 0.67 ± 0.11               | 0.104  |
| 22:5n6 | 0.36 ± 0.07  | 0.38 ± 0.07 <sup>b</sup>   | 0.32 ± 0.07 <sup>a</sup>   | 0.35 ± 0.07 <sup>ab</sup> | 0.010  |
| 22:5n3 | 0.97 ± 0.14  | 0.82 ± 0.16 <sup>c</sup>   | 0.97 ± 0.16 <sup>b</sup>   | 1.15 ± 0.20 <sup>a</sup>  | <0.001 |
| 24:0   | 0.32 ± 0.06  | 0.31 ± 0.05                | 0.33 ± 0.07                | 0.32 ± 0.16               | 0.797  |
| 22:6n3 | 2.59 ± 0.67  | 3.12 ± 0.42 <sup>b</sup>   | 2.38 ± 0.39 <sup>a</sup>   | 2.40 ± 0.63 <sup>a</sup>  | <0.001 |
| 24:1   | 0.41 ± 0.07  | 0.50 ± 0.08                | 0.40 ± 0.06                | 0.47 ± 0.23               | 0.163  |
| SFA    | 41.02 ± 0.75 | 40.40 ± 0.88 <sup>b</sup>  | 40.59 ± 1.00 <sup>ab</sup> | 41.21 ± 0.88 <sup>a</sup> | 0.029  |
| MUFA   | 10.39 ± 0.93 | 10.05 ± 0.63 <sup>b</sup>  | 10.86 ± 1.18 <sup>a</sup>  | 11.51 ± 1.33 <sup>a</sup> | 0.002  |
| PUFA   | 45.88 ± 1.21 | 46.11 ± 1.03 <sup>b</sup>  | 45.22 ± 1.40 <sup>b</sup>  | 43.73 ± 2.60 <sup>a</sup> | 0.001  |

Values are mean ± SD; n=16

Diets: LC, low-carbohydrate; MC, moderate-carbohydrate; HC, high-carbohydrate

P value from 3-way (LC, MC, HC) repeated measures ANOVA. Values not sharing a common letter are different ( $P<0.05$ )

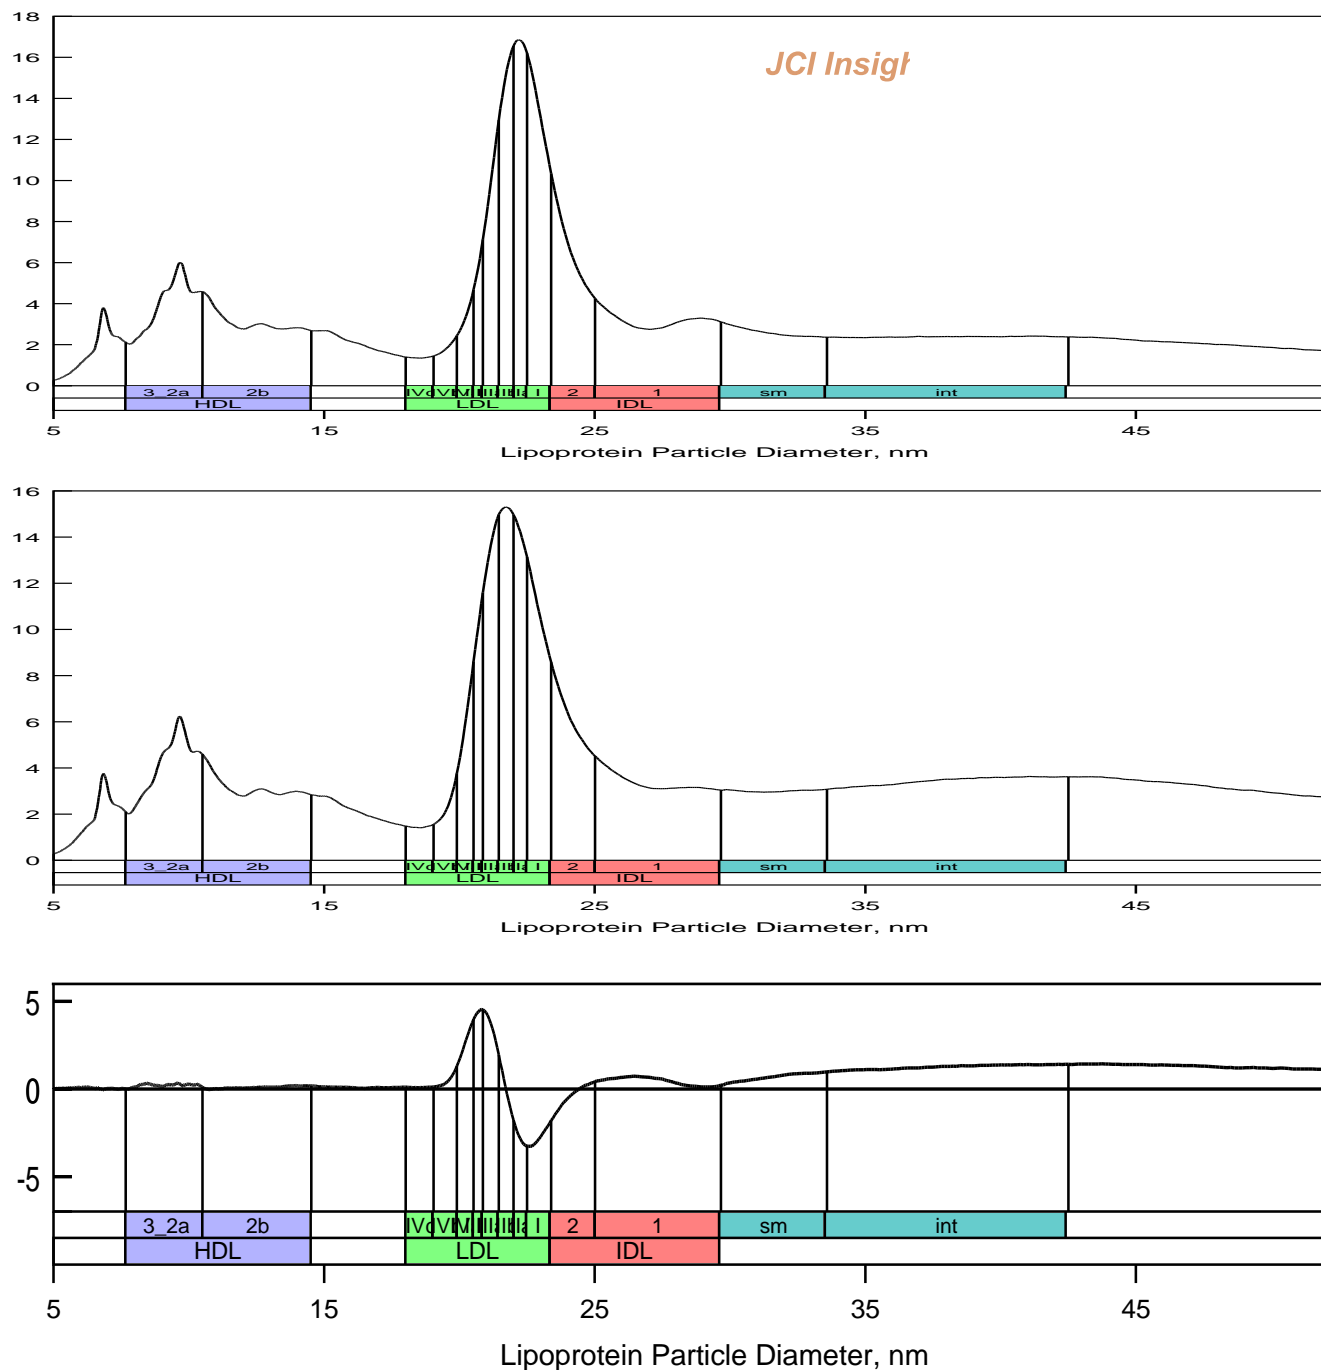

**Figure S1.** Plots of mass distribution of lipoprotein particles as a function of particle diameter. Panels A and B show mean results for LC and HC diets, respectively, and Panel C shows the plot of the HC minus LC difference. Y-axis scale is mass concentration, in arbitrary units, derived from particle concentrations measured as nmol/L (see Table S4).

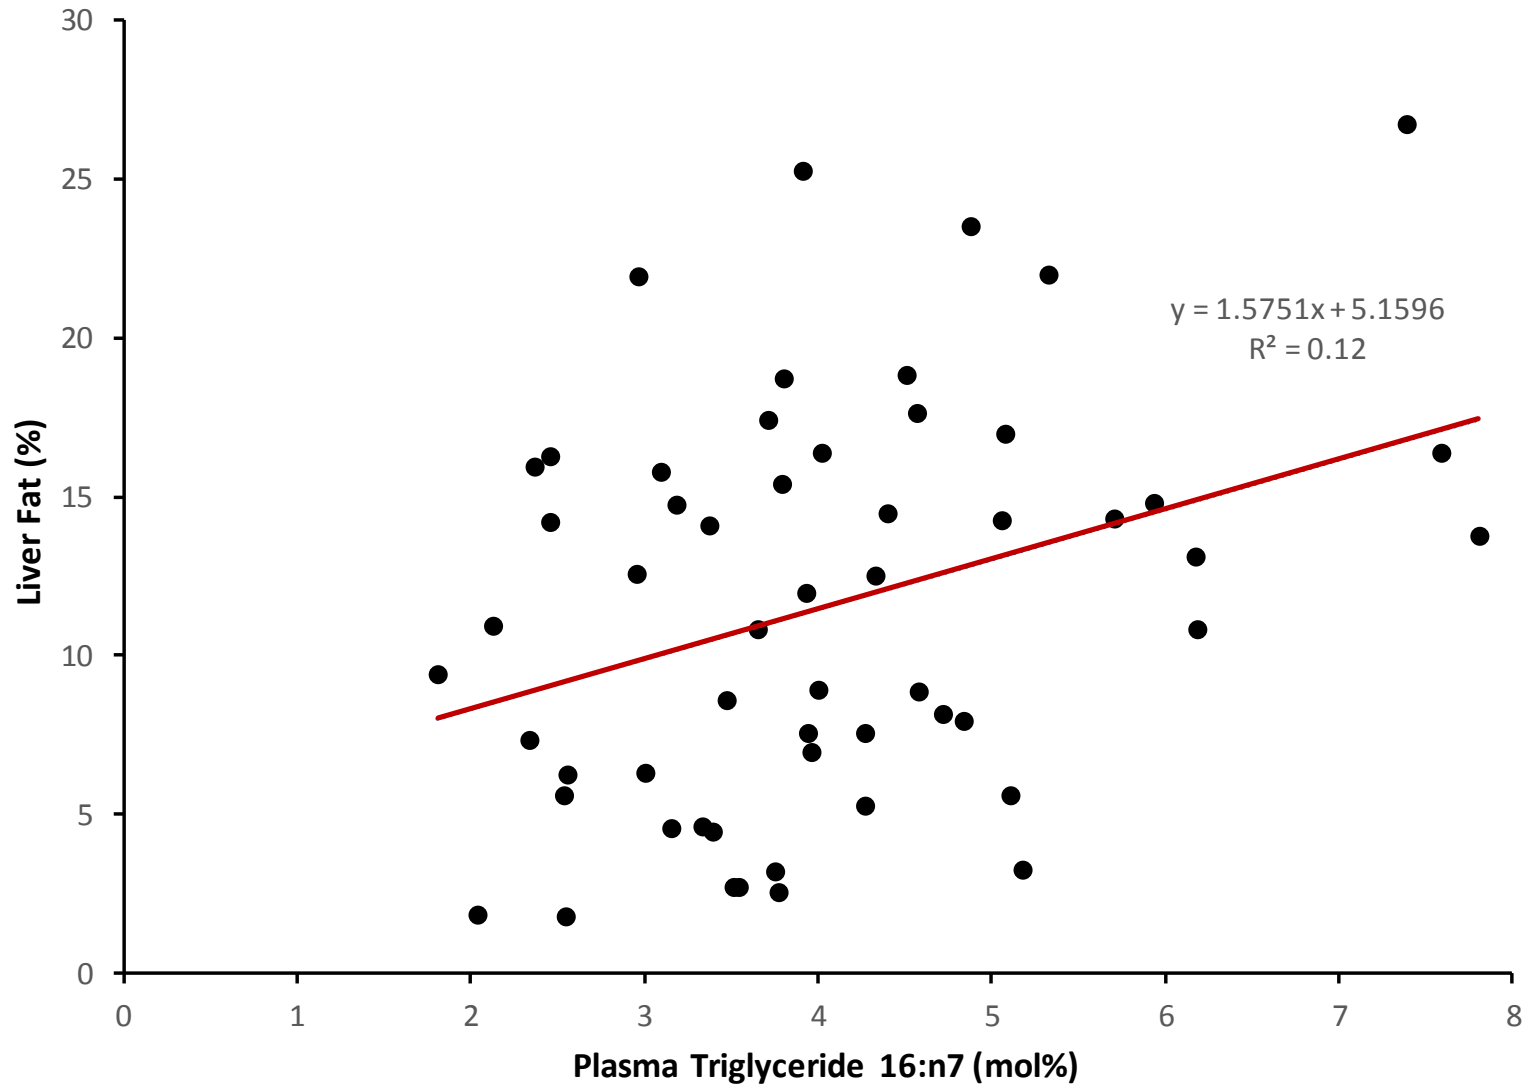

**Figure S2.** Association between plasma triglyceride 16:1n7 and liver fat. Paired data includes 14 subjects with liver scans obtained at baseline and after low-, moderate-, and high-carbohydrate diets.
